# Supplementary material for: Investigation of Inflammation in Lewy Body Dementia: A Systematic Scoping Review
Source: MDPI journal article supplement (doi:10.3390/ijms241512116), 2023-07-28
Supplement: s1 [file s1]

## Figure S2: Example of full search strategy

|                  |                                                                                                                                                                                                                                                                                                                                                                                                                                                                                                                                                                                                                                                                                                                                                                                   |
|------------------|-----------------------------------------------------------------------------------------------------------------------------------------------------------------------------------------------------------------------------------------------------------------------------------------------------------------------------------------------------------------------------------------------------------------------------------------------------------------------------------------------------------------------------------------------------------------------------------------------------------------------------------------------------------------------------------------------------------------------------------------------------------------------------------|
| Database:        | Ovid MEDLINE(R) and Epub Ahead of Print, In-Process, In-Data-Review & Other Non-Indexed Citations and Daily <1946 to January 26, 2023>                                                                                                                                                                                                                                                                                                                                                                                                                                                                                                                                                                                                                                            |
| Search strategy: | <ol style="list-style-type: none"><li>1 Lewy.mp.</li><li>2 dementia with lewy bodies.mp.</li><li>3 microglia.mp.</li><li>4 inflammat*.mp.</li><li>5 Neurogenic Inflammation/</li><li>6 neuroinflammat*.mp. [mp=title, abstract, original title, name of substance word, subject heading word, floating sub-heading word, keyword heading word, organism supplementary concept word, protocol supplementary concept word, rare disease supplementary concept word, unique identifier, synonyms]</li><li>7 parkinsons disease dementia.mp.</li><li>8 dementia.mp.</li><li>9 Parkinson Disease/</li><li>10 parkinsons disease.mp.</li><li>11 9 or 10</li><li>12 8 and 11</li><li>13 1 and 8</li><li>14 2 or 7 or 12 or 13</li><li>15 3 or 4 or 5 or 6</li><li>16 14 and 15</li></ol> |
